# Supplementary material for: The circadian clock gene period extends healthspan in aging Drosophila melanogaster
Source: Aging (Albany NY). 2009 Nov 19;1(11):937–48. doi: 10.18632/aging.100103 (PMC2815745; doi:10.18632/aging.100103)
Supplement: Supplementary Table 2 — Values are Mean ± SEM of 3 separate bioreplicates. Three-way ANOVA with Bonferroni's post-hoc tests was performed for each tissue. Values with different superscripts shown in columns are significantly different at p<0.01. For comparison between genotypes (rows) for each treatment, * = p<0.05 and ** = p<0.001, † = p<0.03 ‡ = p<0.01. Comparison between treatments for each genotype showed significance at p<0.001 in all ages for heads, and on day 35 and 50 for bodies. [file aging-01-937-s002.doc]

| **Age (Days)/ Tissue** | **Normoxia** | | | **Hyperoxia** | | |
| --- | --- | --- | --- | --- | --- | --- |
| **Heads** | **CSp** | ***per01*** | ***per01*{*per+*}** | **CSp** | ***per01*** | ***per01*{*per+*}** |
| **5** | 5.8 ± 0.5a | 7.6 ± 0.9a |  | 14.5 ± 3.7a | 19.2 ± 2.9a |  |
| **20** | 15.6 ± 1.0b | 17.4 ± 3.3b |  | 36.6 ± 1.4b | 47.9 ± 2.1b** |  |
| **35** | 41.0 ± 2.4c | 52.6 ± 0.5c** | 38.6 ± 3.3a | 55.1 ± 3.5c | 72.1 ± 3.1c** | 52.7 ± 3.2a |
| **50** | 45.2 ± 3.5c | 57.3 ± 4.1c* | 41.3 ± 2.0a | 61.1 ± 5.3c | 87.6 ± 3.3d** | 59.3 ± 3.0a |
| **Bodies** |  |  |  |  |  |  |
| **5** | 2.7 ± 0.3a | 4.3 ± 1.0a |  | 4.5 ± 1.2a | 5.7 ± 0.4a |  |
| **20** | 7.9 ± 0.3b | 9.6 ± 1.0b |  | 9.8 ± 1.0b | 12.6 ± 0.2b† |  |
| **35** | 8.7 ± 1.4b | 12.3 ± 3.0b | 7.1 ± 2.0a | 19.0 ± 2.2c | 31.7 ± 4.2c† | 18.3 ± 3.5a |
| **50** | 19.0 ± 3.0c | 28.4 ± 2.3c† | 19.2 ± 1.5b | 29.1 ± 3.8d | 48.1 ± 5.1d‡ | 32.1 ± 2.0b |
